# Supplementary material for: Application of platinum nanoparticles as affinity probe and matrix for direct analysis of small biomolecules and microwave digested proteins using matrix-assisted laser desorption/ionization mass spectrometry
Source: Royal Society of Chemistry journal article supplement (doi:10.1039/c1an15211d), 2011-01-01
Supplement: c1an15211d.pdf [file c1an15211d.pdf]

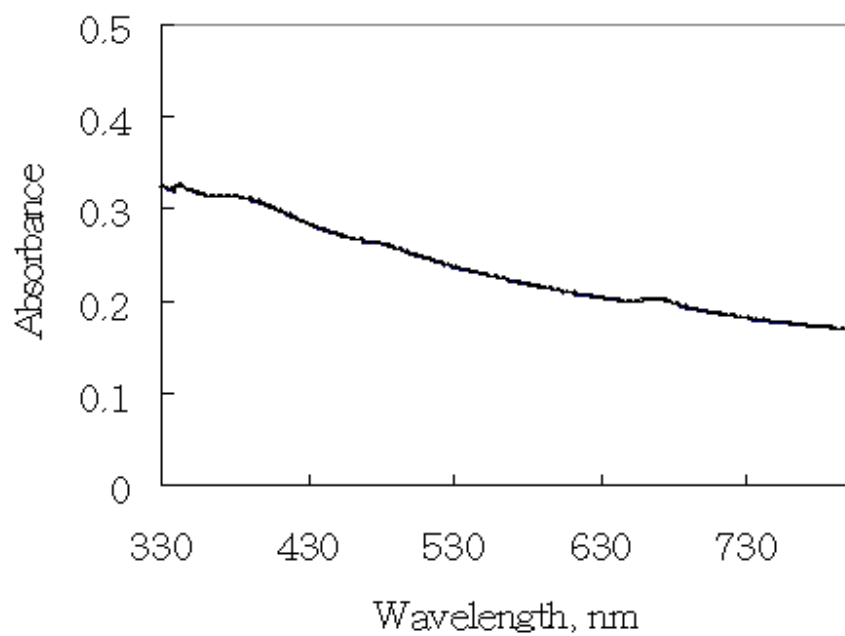

**Figure S1.** UV-Visible spectra of PtNPs

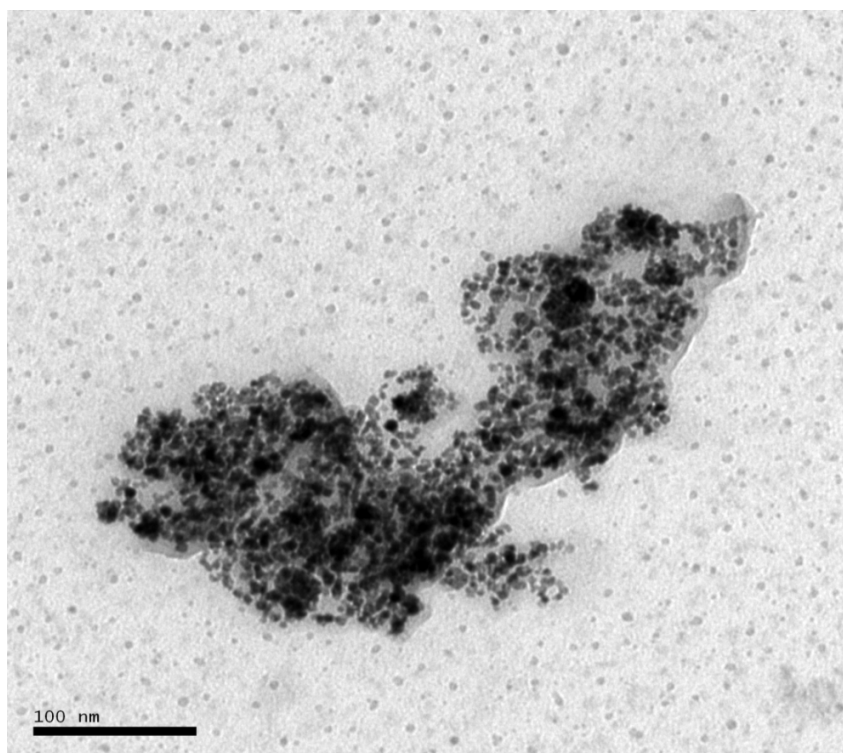

**Figure S2.** TEM images of PtNPs

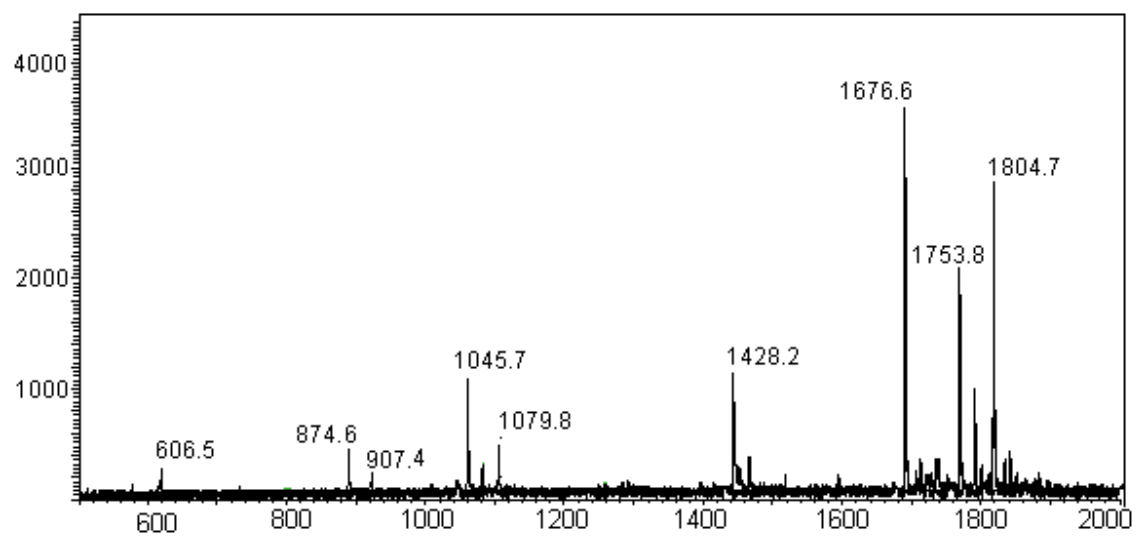

**Figure S3.** MALDI-MS spectra of overnight in-solution tryptic digestion of lysozyme without PtNPs and enzyme-to-protein ratio 1:30 (w/w).

**Table S1.** Peptide sequence for microwave-assisted digested lysozyme protein using PtNPs in MALDI-TOF-MS, shown in figure 5.

| Observed ( $m/z$ )<br>[M+H] <sup>+</sup> | Peptide sequence |
|------------------------------------------|------------------|
| 606.5                                    | KVFGR            |
| 874.4                                    | HGLDNYR          |
| 907.5                                    | CELAAAMK         |
| 923.5                                    | CELAAAMK         |
| 1045.8                                   | GTDVQAWIR        |
| 1079.8                                   | CELAAAMKR        |
| 1428.1                                   | FESNFNTQATNR     |
| 1505.7                                   | WWCNDGRTPGSR     |
| 1676.5                                   | IVSDGNGMNAWVAWR  |
| 1753.8                                   | NTDGSTDYGILQINSR |
| 1804.6                                   | KIVSDGNGMNAWVAWR |

**Table S2.** Peptide sequence for microwave-assisted digested BSA protein using PtNPs in MALDI-TOF-MS, shown in figure 6.

| Observed ( $m/z$ )<br>[M+H] <sup>+</sup> | Peptide sequence       |
|------------------------------------------|------------------------|
| 927.5                                    | YLYEIAR                |
| 1001.4                                   | ALKAWSVAR              |
| 1042.7                                   | KQTALVELLK             |
| 1163.6                                   | LVNELTEFAK             |
| 1195.5                                   | CASIQKFGER             |
| 1249.6                                   | FKDLGGEENFK            |
| 1479.8                                   | LGEYGFQNALIVR          |
| 1559.4                                   | EYEATLEECCA            |
| 1692.9                                   | AEFVEVTKLVTDLTK        |
| 1730.8                                   | QEPERNECFLSHK          |
| 1880.9                                   | RPCFSALTPDETYVPK       |
| 2247.9                                   | ETYGDMADCCEKQEPER      |
| 2472.5                                   | QNCDQFEKLG EYGFQNALIVR |
